# Supplementary material for: Lily Database: A Comprehensive Genomic Resource for the Liliaceae Family
Source: Preprints.org preprint supplement (doi:10.20944/preprints202310.0220.v1), 2023-10-04
Supplement: Supplementary file 4 [file Suppliment_Tables.xlsx]

## Sheet: Table S1
	Table S1. List of the RNA-sequencing libraries and read infroamtions
	SL	Library name	Tissue	Cultivers	No of Raw reads	No of Clean reads	Basepair (Clean Reads)	Treatments	Data source
	1	BE0h	Leaf	Lilium formolongi cv. ‘Sinnapal’	135819704	119046120	5985444702	infect with Botrytis elliptica spores, and sample collected after 0h	Sunchon National University
	2	BE8h	Leaf	Lilium formolongi cv. ‘Sinnapal’	148255724	133992040	6734907100	infect with Botrytis elliptica spores, and sample collected after 8h	Sunchon National University
	3	BE1d	Leaf	Lilium formolongi cv. ‘Sinnapal’	136336492	122356224	6151329860	infect with Botrytis elliptica spores, and sample collected after 1day	Sunchon National University
	4	BE2d	Leaf	Lilium formolongi cv. ‘Sinnapal’	162812528	146166924	7343447112	infect with Botrytis elliptica spores, and sample collected after 2days	Sunchon National University
	5	BE5d	Leaf	Lilium formolongi cv. ‘Sinnapal’	183830184	163371796	8213616684	infect with Botrytis elliptica spores, and sample collected after 5days	Sunchon National University
	6	BE7d	Leaf	Lilium formolongi cv. ‘Sinnapal’	156251112	139991404	7037667834	infect with Botrytis elliptica spores, and sample collected after 7days	Sunchon National University
	7	CP2d	Leaf	Lilium longiflorum cv. ‘Napal’	65564914	59981874	6035864192	After pollination, infect with Botrytis elliptica spores, and sample collected after 2days	Sunchon National University
	8	CP7d	Leaf	Lilium longiflorum cv. ‘Napal’	69015980	62623476	6300655018	After pollination, infect with Botrytis elliptica spores, and sample collected after 7days	Sunchon National University
	9	CP9d	Leaf	Lilium longiflorum cv. ‘Napal’	70076326	63530746	6392002373	After pollination, infect with Botrytis elliptica spores, and sample collected after 9days	Sunchon National University
	10	CP11d	Leaf	Lilium longiflorum cv. ‘Napal’	70279958	64418166	6480921299	After pollination, infect with Botrytis elliptica spores, and sample collected after 11days	Sunchon National University
	11	CP28d	Leaf	Lilium longiflorum cv. ‘Napal’	72813770	66381120	6677817108	After pollination, infect with Botrytis elliptica spores, and sample collected after 28days	Sunchon National University
	12	NP2d	Leaf	Lilium formolongi cv. ‘Sinnapal’	74715778	67616656	6801396843	infect with Botrytis elliptica spores, and sample collected after 2days	Sunchon National University
	13	NP7d	Leaf	Lilium formolongi cv. ‘Sinnapal’	88552386	80309740	8079150355	infect with Botrytis elliptica spores, and sample collected after 7days	Sunchon National University
	14	NP9d	Leaf	Lilium formolongi cv. ‘Sinnapal’	76791724	69138682	6959281319	infect with Botrytis elliptica spores, and sample collected after 9days	Sunchon National University
	15	NP11d	Leaf	Lilium formolongi cv. ‘Sinnapal’	68442304	62152792	6255245744	infect with Botrytis elliptica spores, and sample collected after 11days	Sunchon National University
	16	NP28d	Leaf	Lilium formolongi cv. ‘Sinnapal’	71357570	64699426	6508082243	infect with Botrytis elliptica spores, and sample collected after 28days	Sunchon National University
	17	L2-4	Leaf	Lilium longiflorum (Easter lily)	127426768	121866682	11904610008	sample were collected from 4 months old seedlings	Sunchon National University
	18	L2-28	Leaf	Lilium longiflorum (Easter lily)	122375040	117179384	11455707993	sample were collected from 4 months old seedlings	Sunchon National University
	19	L2-22	Leaf	Lilium longiflorum (Easter lily)	133825614	128284718	12530030581	sample were collected from 4 months old seedlings	Sunchon National University
	20	L2-20	Leaf	Lilium longiflorum (Easter lily)	123060028	117706278	11490241014	sample were collected from 4 months old seedlings	Sunchon National University
	21	L4-7 (L2-4 × L2-28)	Leaf	Hybrid	113400642	108348826	10578943407	sample were collected from 4 months old seedlings	Sunchon National University
	22	L4-104 (L2-22 × L2-20)	Leaf	Hybrid	123876888	118526856	11583123761	sample were collected from 4 months old seedlings	Sunchon National University

## Sheet: Table S2
Table S2. Lily Conserved Orthologous Sequenced based (COS) marker development and characterization
	Count	%
No of sequences used	12695
No of Lily COS Marker develop	1213	9.65
No of COS marker associated with SSR	24	1.98

## Sheet: Table S3
Table S3. Summary of the TF analysis
Item	TFdb	iTAKdb
Number of TF Family	49	46
No of TF Gene	2151	1327
% of TF gene identify	0.59659	0.36805

## Sheet: Table S4
Table S4. Distribution of Lily TF genes among the TF family
	Count		%
TF Family	TFdb	iTAK db	TFdb	iTAK db
AP2	51	41	2.37099	3.08968
ARF	46	41	2.13854	3.08968
ARR-B	9	9	0.41841	0.678222
B3	35	8	1.62715	0.602864
BBR-BPC	12	2	0.55788	0.150716
BES1	11	9	0.51139	0.678222
bHLH	174	77	8.08926	5.80256
bZIP	80	63	3.7192	4.74755
C2H2	117	64	5.43933	4.82291
C3H	86	47	3.99814	3.54182
CO-like	3	0	0.13947	0
CPP	4	0	0.18596	0
DBB	5	5	0.23245	0.37679
Dof	13	13	0.60437	0.979653
E2F/DP	10	10	0.4649	0.75358
EIL	20	10	0.9298	0.75358
ERF	133	88	6.18317	6.6315
FAR1	46	22	2.13854	1.65787
G2-like	64	43	2.97536	3.24039
GATA	55	33	2.55695	2.48681
GeBP	7	0	0.32543	0
GRAS	44	27	2.04556	2.03466
GRF	9	3	0.41841	0.226074
HB-other	29	15	1.34821	1.13037
HD-ZIP	58	48	2.69642	3.61718
HSF	19	13	0.88331	0.979653
LBD	57	24	2.64993	1.80859
LFY	2	2	0.09298	0.150716
LSD	8	6	0.37192	0.452148
MIKC_MADS	62	48	2.88238	3.61718
M-type_MADS	48	30	2.23152	2.26074
MYB	163	139	7.57787	10.4748
MYB_related	169	63	7.85681	4.74755
NAC	130	86	6.0437	6.48078
NF-YA	4	4	0.18596	0.301432
NF-YB	28	19	1.30172	1.4318
NF-YC	53	21	2.46397	1.58252
Nin-like	4	3	0.18596	0.226074
S1Fa-like	5	5	0.23245	0.37679
SBP	7	6	0.32543	0.452148
SRS	3	1	0.13947	0.075358
TALE	29	13	1.34821	0.979653
TCP	47	31	2.18503	2.3361
Trihelix	48	25	2.23152	1.88395
Whirly	3	3	0.13947	0.226074
WOX	7	2	0.32543	0.150716
WRKY	111	89	5.16039	6.70686
YABBY	8	5	0.37192	0.37679
ZF-HD	15	11	0.69735	0.828937
Grand Total	2151	1327	100	100

## Sheet: Table S5
Table S5. Distribution of Lily TF family genes in different family and species level
TF-Family	Species	TFdb	iTAK db
AP2		51	41
	Lili longiflorum Easter	22	14
	Lili longiflorum White	16	15
	Lilium formolongi Sinnapal	13	12
ARF		46	41
	Lili longiflorum Easter	18	16
	Lili longiflorum White	13	11
	Lilium formolongi Sinnapal	11	10
	Lilium hybrid cultivar	4	4
ARR-B		9	9
	Lili longiflorum Easter	4	4
	Lili longiflorum White	3	3
	Lilium formolongi Sinnapal	2	2
B3		35	8
	Lili longiflorum Easter	13	5
	Lili longiflorum White	9	1
	Lilium formolongi Sinnapal	9	2
	Lilium hybrid cultivar	1	0
	Lilium regale	3	0
BBR-BPC		12	2
	Lili longiflorum Easter	6	1
	Lili longiflorum White	4	1
	Lilium formolongi Sinnapal	2	0
BES1		11	9
	Lili longiflorum Easter	4	3
	Lili longiflorum White	5	4
	Lilium formolongi Sinnapal	2	2
bHLH		174	77
	Lili longiflorum Easter	65	26
	Lili longiflorum White	53	22
	Lilium formolongi Sinnapal	54	28
	Lilium hybrid cultivar	1	0
	Lilium regale	1	1
bZIP		80	63
	Lili longiflorum Easter	32	22
	Lili longiflorum White	22	20
	Lilium formolongi Sinnapal	23	18
	Lilium hybrid cultivar	2	2
	Lilium regale	1	1
C2H2		117	64
	Lili longiflorum Easter	42	23
	Lili longiflorum White	32	16
	Lilium formolongi Sinnapal	41	24
	Lilium regale	2	1
C3H		86	47
	Lili longiflorum Easter	30	18
	Lili longiflorum White	26	13
	Lilium formolongi Sinnapal	29	16
	Lilium longiflorum	1	0
CO-like		3	0
	Lili longiflorum Easter	1	0
	Lili longiflorum White	1	0
	Lilium formolongi Sinnapal	1	0
CPP		4	0
	Lili longiflorum Easter	2	0
	Lili longiflorum White	1	0
	Lilium formolongi Sinnapal	1	0
DBB		5	5
	Lili longiflorum Easter	3	3
	Lilium formolongi Sinnapal	2	2
Dof		13	13
	Lili longiflorum Easter	4	4
	Lili longiflorum White	3	3
	Lilium formolongi Sinnapal	5	5
	Lilium regale	1	1
E2F/DP		10	10
	Lili longiflorum Easter	4	4
	Lili longiflorum White	4	4
	Lilium formolongi Sinnapal	2	2
EIL		20	10
	Lili longiflorum Easter	8	3
	Lili longiflorum White	5	2
	Lilium formolongi Sinnapal	4	3
	Lilium hybrid cultivar	1	1
	Lilium longiflorum	1	0
	Lilium regale	1	1
ERF		133	88
	Lili longiflorum Easter	49	34
	Lili longiflorum White	30	18
	Lilium formolongi Sinnapal	48	31
	Lilium hybrid cultivar	3	2
	Lilium longiflorum	1	1
	Lilium regale	2	2
FAR1		46	22
	Lili longiflorum Easter	19	10
	Lili longiflorum White	14	6
	Lilium formolongi Sinnapal	13	6
G2-like		64	43
	Lili longiflorum Easter	28	21
	Lili longiflorum White	16	7
	Lilium formolongi Sinnapal	20	15
GATA		55	33
	Lili longiflorum Easter	19	13
	Lili longiflorum White	18	11
	Lilium formolongi Sinnapal	16	8
	Lilium longiflorum	2	1
GeBP		7	0
	Lili longiflorum Easter	3	0
	Lili longiflorum White	3	0
	Lilium formolongi Sinnapal	1	0
GRAS		44	27
	Lili longiflorum Easter	18	13
	Lili longiflorum White	16	10
	Lilium formolongi Sinnapal	8	4
	Lilium longiflorum	2	0
GRF		9	3
	Lili longiflorum Easter	4	2
	Lili longiflorum White	2	0
	Lilium formolongi Sinnapal	3	1
HB-other		29	15
	Lili longiflorum Easter	9	3
	Lili longiflorum White	9	6
	Lilium formolongi Sinnapal	11	6
HD-ZIP		58	48
	Lili longiflorum Easter	20	17
	Lili longiflorum White	16	11
	Lilium formolongi Sinnapal	20	18
	Lilium hybrid cultivar	2	2
HSF		19	13
	Lili longiflorum Easter	8	6
	Lili longiflorum White	4	2
	Lilium formolongi Sinnapal	6	4
	Lilium longiflorum	1	1
LBD		57	24
	Lili longiflorum Easter	25	12
	Lili longiflorum White	15	4
	Lilium formolongi Sinnapal	17	8
LFY		2	2
	Lilium hybrid cultivar	1	1
	Lilium longiflorum	1	1
LSD		8	6
	Lili longiflorum Easter	3	2
	Lili longiflorum White	2	2
	Lilium formolongi Sinnapal	3	2
MIKC_MADS		62	48
	Lili longiflorum Easter	13	8
	Lili longiflorum White	10	6
	Lilium formolongi Sinnapal	10	6
	Lilium formosanum	9	8
	Lilium hybrid cultivar	3	3
	Lilium longiflorum	10	10
	Lilium regale	7	7
M-type_MADS		48	30
	Lili longiflorum Easter	17	11
	Lili longiflorum White	12	6
	Lilium formolongi Sinnapal	19	13
MYB		163	139
	Lili longiflorum Easter	50	42
	Lili longiflorum White	34	27
	Lilium formolongi Sinnapal	41	33
	Lilium formosanum	3	3
	Lilium hybrid cultivar	30	29
	Lilium longiflorum	4	4
	Lilium regale	1	1
MYB_related		169	63
	Lili longiflorum Easter	58	21
	Lili longiflorum White	52	17
	Lilium formolongi Sinnapal	46	21
	Lilium hybrid cultivar	2	1
	Lilium longiflorum	8	2
	Lilium regale	3	1
NAC		130	86
	Lili longiflorum Easter	47	30
	Lili longiflorum White	34	21
	Lilium formolongi Sinnapal	46	32
	Lilium hybrid cultivar	2	2
	Lilium regale	1	1
NF-YA		4	4
	Lili longiflorum Easter	1	1
	Lili longiflorum White	1	1
	Lilium formolongi Sinnapal	2	2
NF-YB		28	19
	Lili longiflorum Easter	12	7
	Lili longiflorum White	8	6
	Lilium formolongi Sinnapal	8	6
NF-YC		53	21
	Lili longiflorum Easter	17	8
	Lili longiflorum White	18	5
	Lilium formolongi Sinnapal	17	8
	Lilium regale	1	0
Nin-like		4	3
	Lili longiflorum Easter	1	1
	Lili longiflorum White	2	1
	Lilium formolongi Sinnapal	1	1
S1Fa-like		5	5
	Lili longiflorum Easter	1	1
	Lili longiflorum White	2	2
	Lilium formolongi Sinnapal	2	2
SBP		7	6
	Lili longiflorum Easter	3	3
	Lili longiflorum White	2	1
	Lilium formolongi Sinnapal	2	2
SRS		3	1
	Lili longiflorum Easter	1	1
	Lili longiflorum White	2	0
TALE		29	13
	Lili longiflorum Easter	8	4
	Lili longiflorum White	11	5
	Lilium formolongi Sinnapal	8	2
	Lilium hybrid cultivar	2	2
TCP		47	31
	Lili longiflorum Easter	21	15
	Lili longiflorum White	12	9
	Lilium formolongi Sinnapal	13	7
	Lilium longiflorum	1	0
Trihelix		48	25
	Lili longiflorum Easter	14	8
	Lili longiflorum White	18	10
	Lilium formolongi Sinnapal	13	6
	Lilium hybrid cultivar	1	1
	Lilium longiflorum	1	0
	Lilium regale	1	0
Whirly		3	3
	Lili longiflorum Easter	1	1
	Lili longiflorum White	1	1
	Lilium formolongi Sinnapal	1	1
WOX		7	2
	Lili longiflorum Easter	3	2
	Lili longiflorum White	2	0
	Lilium formolongi Sinnapal	2	0
WRKY		111	89
	Lili longiflorum Easter	21	14
	Lili longiflorum White	27	19
	Lilium formolongi Sinnapal	29	23
	Lilium hybrid cultivar	1	1
	Lilium longiflorum	11	10
	Lilium regale	22	22
YABBY		8	5
	Lili longiflorum Easter	2	1
	Lili longiflorum White	2	1
	Lilium formolongi Sinnapal	3	2
	Lilium longiflorum	1	1
ZF-HD		15	11
	Lili longiflorum Easter	8	6
	Lili longiflorum White	2	1
	Lilium formolongi Sinnapal	5	4
Grand Total		2151	1327
